# Supplementary material for: Synthesis of a low-silica CHA zeolite with exceptional selectivity for radioactive137Cs+
Source: Royal Society of Chemistry journal article supplement (doi:10.1039/d3qi00030c), 2023-01-01
Supplement: d3qi00030c1.pdf [file d3qi00030c1.pdf]

*Electronic Supplementary Information*

**Synthesis of low-silica CHA zeolite with  
exceptional selectivity for radioactive  $^{137}\text{Cs}^+$**

Wenfeng Hao,<sup>[a]</sup> Xiaojun Yan,<sup>[b]</sup> Xiliang Guo,<sup>[b]</sup> Wentao Wang,<sup>[c]</sup> Taihong Yan,<sup>[c]</sup> Jia-  
Nan Zhang,<sup>[d]</sup> Wenfu Yan,<sup>\*[a]</sup>

---

<sup>a</sup> *State Key Laboratory of Inorganic Synthesis and Preparative Chemistry,  
College of Chemistry, Jilin University, Changchun 130012, China. E-mail:  
[yanw@jlu.edu.cn](mailto:yanw@jlu.edu.cn)*

<sup>b</sup> *Division of Waste Disposal Technology, Waste Management Department,  
China Institute for Radiation Protection, Taiyuan 030006, Shanxi, China*

<sup>c</sup> *Department of Radiochemistry, China Institute of Atomic Energy, Beijing  
102413, China*

<sup>d</sup> *College of Materials Science and Engineering, Zhengzhou University,  
Zhengzhou 450001, PR China*

---

\* Co-corresponding authors

Email: [yanw@jlu.edu.cn](mailto:yanw@jlu.edu.cn)

**Table S1** Low-silicon CHA zeolite synthetic methods

| Synthesis formula                                                                                                                                      | methods                 | Product Si/Al | Ref       |
|--------------------------------------------------------------------------------------------------------------------------------------------------------|-------------------------|---------------|-----------|
| SiO <sub>2</sub> : 0.05 Al <sub>2</sub> O <sub>3</sub> : 0.2 NaOH: 0.2 TMAda <sup>+</sup> : 10 H <sub>2</sub> O                                        | OSDA                    | 2.8           | 1         |
| 5 SiO <sub>2</sub> : Al <sub>2</sub> O <sub>3</sub> : 1.95 K <sub>2</sub> O:1.5 NH <sub>4</sub> F:175 H <sub>2</sub> O                                 | in fluoride media       | 2.5           | 2         |
| 5 SiO <sub>2</sub> :Al <sub>2</sub> O <sub>3</sub> : 3 KOH:0.75 NH <sub>4</sub> F:80 H <sub>2</sub> O                                                  | in fluoride media       | 2.26          | 3         |
| 6.02 SiO <sub>2</sub> : Al <sub>2</sub> O <sub>3</sub> : 8.23: Na <sub>2</sub> O: 656 H <sub>2</sub> O                                                 | add seeds               | 1.6           | 4         |
| 5.18 SiO <sub>2</sub> : Al <sub>2</sub> O <sub>3</sub> : 0.17 Na <sub>2</sub> O:2.0 K <sub>2</sub> O: 224 H <sub>2</sub> O                             | rotating crystal method | 2.2           | 5         |
| 3.70 SiO <sub>2</sub> : Al <sub>2</sub> O <sub>3</sub> : 0.095 Na <sub>2</sub> O: 8.03 K <sub>2</sub> O: 350 H <sub>2</sub> O                          | rotating crystal method | 1.58          | 6         |
| 16 SiO <sub>2</sub> : 0.8 Al <sub>2</sub> O <sub>3</sub> : 9.5 Na <sub>2</sub> O: 0.85 K <sub>2</sub> O: 0.35 Cs <sub>2</sub> O: 125 H <sub>2</sub> O. | hydrothermal synthesis  | 2.0           | 7         |
| 0.28 Al(OH) <sub>3</sub> : SiO <sub>2</sub> : 0.66 KOH: 0.01 Sr(NO <sub>3</sub> ) <sub>2</sub> : 20 H <sub>2</sub> O                                   | hydrothermal synthesis  | 2.06          | 8         |
| 3.99 SiO <sub>2</sub> : Al <sub>2</sub> O <sub>3</sub> : 0.092 Na <sub>2</sub> O: 1.067 K <sub>2</sub> O: 171 H <sub>2</sub> O                         | One-pot method          | 2.06          | This work |

**Table S2** Removal performance for Cs<sup>+</sup> of Na-CHA zeolite and other adsorbents

| Materials                 | Initial concentration of Cs <sup>+</sup> | Competing ions                                                                                                                     | K <sub>d</sub> (mL/g)      | Ref.                 |
|---------------------------|------------------------------------------|------------------------------------------------------------------------------------------------------------------------------------|----------------------------|----------------------|
| KATS-2                    | 17.59 ppm                                | Na <sup>+</sup> : 9669.63 ppm;<br>K <sup>+</sup> : 367.55 ppm;<br>Ca <sup>2+</sup> : 331.62 ppm;<br>Mg <sup>2+</sup> : 1109.93 ppm | $3.28 \times 10^3$         | 9                    |
| K-RWY                     | 1 ppm                                    | Na <sup>+</sup> : 40 ppm;<br>K <sup>+</sup> : 5 ppm;<br>Ca <sup>2+</sup> : 25 ppm;<br>Mg <sup>2+</sup> : 5 ppm                     | 4.9×10 <sup>4</sup>        | 10                   |
| K-RWY                     | 1 ppm                                    | Na <sup>+</sup> : 9000 ppm;<br>K <sup>+</sup> : 320 ppm;<br>Ca <sup>2+</sup> : 370 ppm;<br>Mg <sup>2+</sup> : 1100 ppm             | ~1.17×10 <sup>3</sup>      | 10                   |
| NaMT1                     | 1.58 ppm                                 | Na <sup>+</sup> : 145 ppm;<br>K <sup>+</sup> : 230 ppm;<br>Ca <sup>2+</sup> : 25 ppm;                                              | 1.52×10 <sup>3</sup>       | 11                   |
| K-MPS-1                   | 31.42 ppm                                | Na <sup>+</sup> : 20.41 ppm;<br>Rb <sup>+</sup> : 25.43 ppm;<br>Ca <sup>2+</sup> : 9.70 ppm;<br>Mg <sup>2+</sup> : 0.29 ppm;       | 1.03×10 <sup>3</sup>       | 12                   |
| FJSM-SnS                  | 2.056 ppm                                | Na <sup>+</sup> : 77 ppm;<br>K <sup>+</sup> : 6 ppm;<br>Ca <sup>2+</sup> : 8 ppm;<br>Mg <sup>2+</sup> : 8 ppm                      | 215                        | 13                   |
| MIL-101-SO <sub>3</sub> H | 229.50 ppm                               | Na <sup>+</sup> : 2371 ppm;<br>K <sup>+</sup> : 3744 ppm;                                                                          | 203.46                     | 14                   |
| 10S-CHA                   | 18780 Bq/L<br>5.87 ppt                   | Na <sup>+</sup> : 10000 ppm;<br>K <sup>+</sup> : 500 ppm;<br>Ca <sup>2+</sup> : 500 ppm;<br>Mg <sup>2+</sup> : 1500 ppm            | 1.85×10 <sup>4</sup>       | 15                   |
| <b>Na-CHA</b>             | <b>1587.22 Bq/L<br/>0.496 ppt</b>        | <b>real nuclear<br/>wastewater</b>                                                                                                 | <b>2.17×10<sup>5</sup></b> | <b>This<br/>work</b> |

**Table S3** The maximum adsorption capacity ( $q_m$ ) for Cs<sup>+</sup> of various adsorbents.

| <b>Materials</b>                                                  | <b><math>q_m</math> (mg/g)</b> | <b>Ref.</b>      |
|-------------------------------------------------------------------|--------------------------------|------------------|
| KMS-2                                                             | 531.7                          | 16               |
| hf-TiFC                                                           | 454.54                         | 17               |
| MIL-101-SO <sub>3</sub> H                                         | 453                            | 14               |
| FJSM-SnS                                                          | 408.91                         | 13               |
| KATS-2                                                            | 358                            | 9                |
| KMS-1/r-GO                                                        | 338.18                         | 18               |
| GP-CuFC                                                           | 328.28                         | 19               |
| K-MPS-1                                                           | 337.5                          | 12               |
| Zinc ferrocyanide                                                 | 372                            | 20               |
| K-RWY                                                             | 310                            | 10               |
| NaMT1                                                             | 290.7                          | 11               |
| Na <sub>2</sub> V <sub>6</sub> O <sub>16</sub> •3H <sub>2</sub> O | 285.735                        | 21               |
| KTS-3                                                             | 280                            | 22               |
| Sulfonated Hyper-cross-linked polymer                             | 273                            | 23               |
| Commercial CST (UOP)                                              | 266                            | 24               |
| KMS-1                                                             | 226                            | 25               |
| Zeolite A                                                         | 207.47                         | 26               |
| FJSM-InMOF                                                        | 198.63                         | 27               |
| K <sub>4</sub> Nb <sub>6</sub> O <sub>7</sub>                     | 166.125                        | 28               |
| FJSM-GAS-1                                                        | 164                            | 29               |
| Cu-BTC/KNiFC                                                      | 153                            | 30               |
| Hollow PB nanoparticles (190 nm)                                  | 131                            | 31               |
| Ca-Phl                                                            | 91.7                           | 32               |
| AMP-PAN                                                           | 81                             | 33               |
| Natural clinoptilolite                                            | 168.9                          |                  |
| Natural chabazite                                                 | 275.3                          | 34               |
| Natural mordenite                                                 | 256.7                          |                  |
| Na-mordenite (MOR)                                                | 222.1                          | 35               |
| Commercial NaX                                                    | 308                            |                  |
| <b>Na-CHA</b>                                                     | <b>442.48</b>                  | <b>This work</b> |

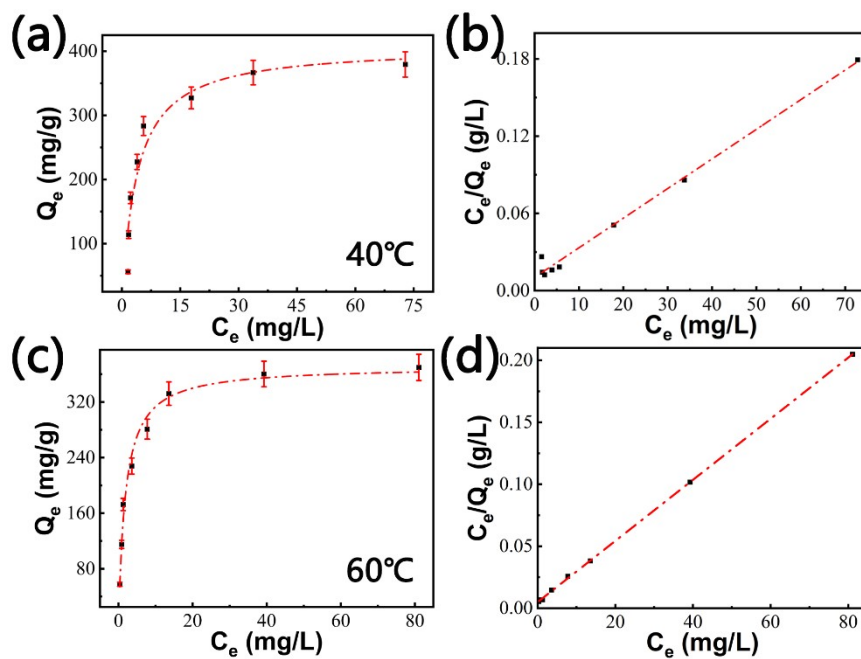

**Fig. S1** (a) (c) Adsorption isotherms of Cs<sup>+</sup> adsorption in Na-CHA zeolite at 40 and 60 °C respectively, (b) (d) Linear fitting with the Langmuir model of Cs<sup>+</sup> adsorption in Na-CHA zeolite at 40 and 60 °C respectively.

**Table.S4** Langmuir isotherm parameters for Cs<sup>+</sup> adsorption in Na-CHA zeolite at 40 and 60 °C.

| Langmuir isotherm parameters |               |             | Langmuir isotherm parameters |               |             |
|------------------------------|---------------|-------------|------------------------------|---------------|-------------|
| 40 °C                        |               |             | 60 °C                        |               |             |
| $R^2$                        | $Q_m$<br>mg/g | $b$<br>L/mg | $R^2$                        | $Q_m$<br>mg/g | $b$<br>L/mg |
| 0.991                        | 434.78        | 0.223       | 0.999                        | 406.50        | 0.491       |

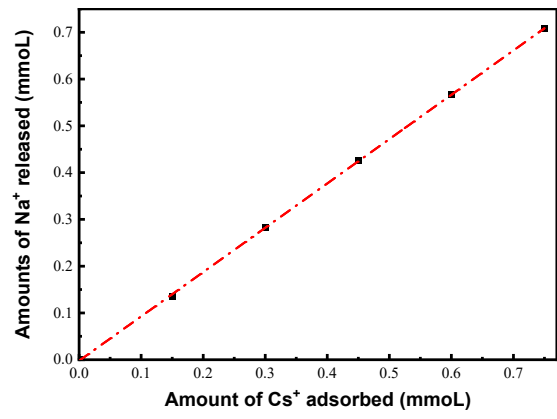

**Fig. S2** Relationship between the adsorption amount of cesium and the release amount of sodium

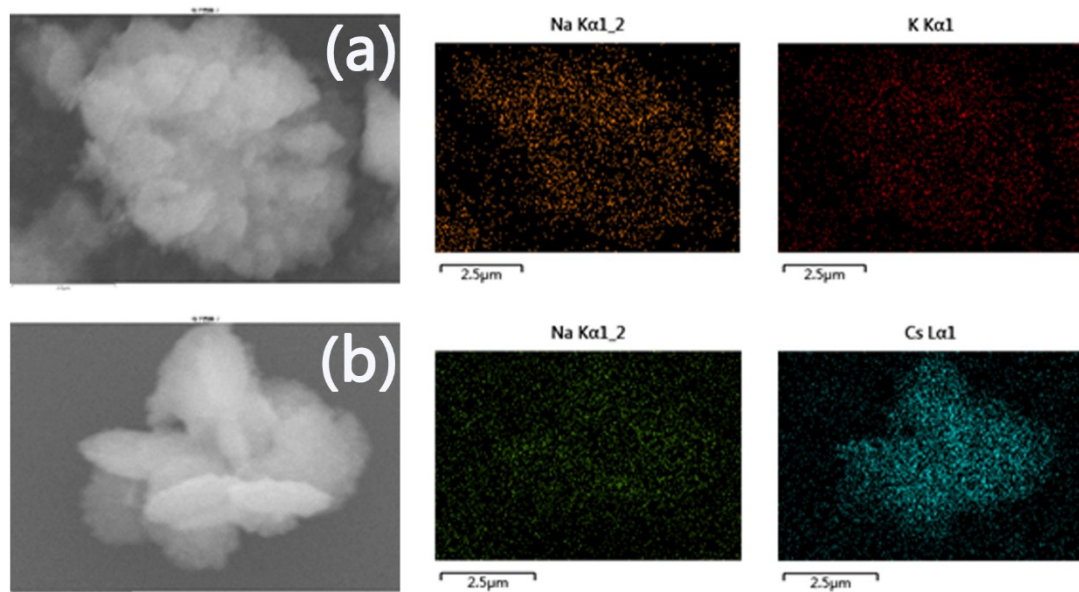

**Fig. S3** (a) SEM elemental mapping images of Na-CHA zeolite, and (b) Cs-loaded Na-CHA zeolite

## References:

1. T. Nishitoba, N. Yoshida, J. N. Kondo and T. Yokoi, Control of Al Distribution in the CHA-Type Aluminosilicate Zeolites and Its Impact on the Hydrothermal Stability and Catalytic Properties, *Ind. Eng. Chem. Res.*, 2018, **57**, 3914-3922.
2. B. Liu, Y. Zheng, N. Hu, T. Gui, Y. Li, F. Zhang, R. Zhou, X. Chen and H. Kita, Synthesis of low-silica CHA zeolite chabazite in fluoride media without organic structural directing agents and zeolites, *Microporous Mesoporous Mater.*, 2014, **196**, 270-276.
3. X. Deng, P. Zhou, X. Yan, R. Xiong, H. Kou and W. Luo, Green synthesis of low-silica CHA zeolite without organic structural directing agents, fluoride media and seeds, *Microporous Mesoporous Mater.*, 2021, **310**.
4. A. Wallace, G. C. Kester, C. Bongo, W. Casteel, G. Lau, R. Whitley and C. G. Coe, Improved gel synthesis enables routes to Al-rich chabazite, *Microporous Mesoporous Mater.*, 2021, **312**.
5. J. Shang, G. Li, R. Singh, P. Xiao, J. Z. Liu and P. A. Webley, Potassium Chabazite: A Potential Nanocontainer for Gas Encapsulation, *J. Phys. Chem. C*, 2010, **114**, 22025–22031.
6. A. Wallace, G. Kester, W. Casteel, G. Lau, R. Whitley and C. Coe, A Study of Structural Defects in X- and Y-Type Zeolites and Their Effect on Their Transformation to Aluminum-Rich Chabazite, *J. Phys. Chem. C*, 2021, **125**, 12848-12856.
7. M. Debost, P. B. Klar, N. Barrier, E. B. Clatworthy, J. Grand, F. Laine, P. Brazda, L. Palatinus, N. Nesterenko, P. Boullay and S. Mintova, Synthesis of Discrete CHA Zeolite Nanocrystals without Organic Templates for Selective CO<sub>2</sub> Capture, *Angew. Chem. Int. Ed.*, 2020, **59**, 23491-23495.
8. J. Yang, J. Liu, P. Liu, L. Li, X. Tang, H. Shang, J. Li and B. Chen, K-Chabazite Zeolite Nanocrystal Aggregates for Highly Efficient Methane Separation, *Angew. Chem. Int. Ed.*, 2022, **61**, e202116850.
9. C. Yang and K. Cho, Rapid and selective removal of Cs<sup>+</sup> from water by layered potassium antimony thioantimonate, *J. Hazard. Mater.*, 2021, **403**, 124105.
10. H. Yang, M. Luo, L. Luo, H. Wang, D. Hu, J. Lin, X. Wang, Y. Wang, S. Wang, X. Bu, P. Feng and T. Wu, Highly Selective and Rapid Uptake of Radionuclide Cesium Based on Robust Zeolitic Chalcogenide via Stepwise Ion-Exchange Strategy, *Chem. Mater.*, 2016, **28**, 8774-8780.
11. Y. Kim, Y. K. Kim, J. H. Kim, M.-S. Yim, D. Harbottle and J. W. Lee, Synthesis of functionalized porous montmorillonite via solid-state NaOH treatment for efficient removal of cesium and strontium ions, *Appl. Surf. Sci.*, 2018, **450**, 404-412.
12. E. Rathore, P. Pal and K. Biswas, Reversible and Efficient Sequestration of Cesium from Water by the Layered Metal Thiophosphate K<sub>0.48</sub>Mn<sub>0.76</sub>PS<sub>3</sub>H<sub>2</sub>O, *Chem. Eur. J.*, 2017, **23**, 11085-11092.
13. X.-H. Qi, K.-Z. Du, M.-L. Feng, J.-R. Li, C.-F. Du, B. Zhang and X.-Y. Huang, A two-dimensionally microporous thioantimonate with superior Cs<sup>+</sup> and Sr<sup>2+</sup> ion-exchange property, *J. Mater. Chem. A*, 2015, **3**, 5665-5673.
14. B. Aguila, D. Banerjee, Z. Nie, Y. Shin, S. Ma and P. K. Thallapally, Selective removal of cesium and strontium using porous frameworks from high level nuclear waste, *ChemComm*, 2016, **52**, 5940-5942.
15. Y. Hee Man, P. Chan Woo, K. Ilgook, Y. In-Ho and S. Youngho, Sulfur-modified chabazite as a low-cost ion exchanger for the highly selective and simultaneous removal of cesium and strontium, *Appl. Surf. Sci.*, 2021, **536**, 147776.
16. J. L. Mertz, Z. H. Fard, C. D. Malliakas, M. J. Manos and M. G. Kanatzidis, Selective Removal of Cs<sup>+</sup>, Sr<sup>2+</sup>, and Ni<sup>2+</sup> by K<sub>2x</sub>Mg<sub>x</sub>Sn<sub>3-x</sub>S<sub>6</sub> (x = 0.5–1) (KMS-2) Relevant to Nuclear Waste Remediation, *Chem. Mater.*, 2013, **25**, 2116-2127.
17. H.-M. Yang, C. W. Park, I. Kim and I.-H. Yoon, Hollow flower-like titanium ferrocyanide structure for the highly efficient removal of radioactive cesium from water, *Chem. Eng. J.*, 2019, 123713.
18. K. Gupta, B. Yuan, C. Chen, N. Varnakavi and M.-L. Fu, K<sub>2x</sub>Mn<sub>x</sub>Sn<sub>3-x</sub>S<sub>6</sub> (x = 0.5–0.95) (KMS-1) immobilized on the reduced graphene oxide as KMS-1/r-GO aerogel to effectively remove Cs<sup>+</sup> and Sr<sup>2+</sup> from aqueous solution, *Chem. Eng. J.*, 2019, **369**, 803-812.
19. R. I. Turgis, G. Arrachart, C. Delchet, C. Rey, Y. Barré, S. p. Pellet-Rostaing, Y. Guari, J. Larionova and A. s. Grandjean,



- An original “click and bind” approach for immobilizing copper hexacyanoferrate nanoparticles on mesoporous silica, *Chem. Mater.*, 2013, **25**, 4447-4453.
20. K. Shakir, M. Sohsah and M. Soliman, Removal of cesium from aqueous solutions and radioactive waste simulants by coprecipitate flotation, *Sep. Purif. Technol.*, 2007, **54**, 373-381.
  21. S. Sarina, A. Bo, D. Liu, H. Liu, D. Yang, C. Zhou, N. Maes, S. Komarneni and H. Zhu, Separate or simultaneous removal of radioactive cations and anions from water by layered sodium vanadate-based sorbents, *Chem. Mater.*, 2014, **26**, 4788-4795.
  22. D. Sarma, C. D. Malliakas, K. S. Subrahmanyam, S. M. Islam and M. G. Kanatzidis,  $K_{2x}Sn_{4-x}S_{8-x}$  ( $x = 0.65-1$ ): a new metal sulfide for rapid and selective removal of  $Cs^+$ ,  $Sr^{2+}$  and  $UO_2^{2+}$  ions, *Chem. Sci.*, 2016, **7**, 1121-1132.
  23. A. M. James, S. Harding, T. Robshaw, N. Bramall, M. D. Ogden and R. Dawson, Selective Environmental Remediation of Strontium and Cesium Using Sulfonated Hyper-Cross-Linked Polymers (SHCPs), *ACS Appl. Mater. Interfaces*, 2019, **11**, 22464-22473.
  24. S. Chitra, S. Viswanathan, S. V. S. Rao and P. K. Sinha, Uptake of cesium and strontium by crystalline silicotitanates from radioactive wastes, *J RADIOANAL NUCL CH*, 2010, **287**, 955-960.
  25. M. J. Manos and M. G. Kanatzidis, Highly Efficient and Rapid  $Cs^+$  Uptake by the Layered Metal Sulfide  $K_{2x}Mn_xSn_{3-x}S_6$  (KMS-1), *J. Am. Chem. Soc.*, 2009, **131**, 6599-6607.
  26. A. El-Kamash, Evaluation of zeolite A for the sorptive removal of  $Cs^+$  and  $Sr^{2+}$  ions from aqueous solutions using batch and fixed bed column operations, *J. Hazard. Mater.*, 2008, **151**, 432-445.
  27. Y.-J. Gao, M.-L. Feng, B. Zhang, Z.-F. Wu, Y. Song and X.-Y. Huang, An easily synthesized microporous framework material for the selective capture of radioactive  $Cs^+$  and  $Sr^{2+}$  ions, *J. Mater. Chem. A*, 2018, **6**, 3967-3976.
  28. J. Sun, D. Yang, C. Sun, L. Liu, S. Yang, Y. A. Jia, R. Cai and X. Yao, Potassium niobate nanolamina: a promising adsorbent for entrapment of radioactive cations from water, *Sci. Rep.*, 2014, **4**, 7313.
  29. M.-L. Feng, D. Sarma, Y.-J. Gao, X.-H. Qi, W.-A. Li, X.-Y. Huang and M. G. Kanatzidis, Efficient removal of  $[UO_2]^{2+}$ ,  $Cs^+$ , and  $Sr^{2+}$  ions by radiation-resistant gallium thioantimonates, *J. Am. Chem. Soc.*, 2018, **140**, 11133-11140.
  30. S. Naeimi and H. Faghihian, Performance of novel adsorbent prepared by magnetic metal-organic framework (MOF) modified by potassium nickel hexacyanoferrate for removal of  $Cs^+$  from aqueous solution, *Sep. Purif. Technol.*, 2017, **175**, 255-265.
  31. N. L. Torad, M. Hu, M. Imura, M. Naito and Y. Yamauchi, Large Cs adsorption capability of nanostructured Prussian Blue particles with high accessible surface areas, *J. Mater. Chem.*, 2012, **22**, 18261.
  32. K. Tamura, T. Kogure, Y. Watanabe, C. Nagai and H. Yamada, Uptake of cesium and strontium ions by artificially altered phlogopite, *Environ. Sci. Technol.*, 2014, **48**, 5808-5815.
  33. Y. Park, Y.-C. Lee, W. S. Shin and S.-J. Choi, Removal of cobalt, strontium and cesium from radioactive laundry wastewater by ammonium molybdophosphate-polyacrylonitrile (AMP-PAN), *Chem. Eng. J.*, 2010, **162**, 685-695.
  34. E. H. Borai, R. Harjula, L. Malinen and A. Paajanen, Efficient removal of cesium from low-level radioactive liquid waste using natural and impregnated zeolite minerals, *J. Hazard. Mater.*, 2009, **172**, 416-422.
  35. E. Han, Y.-G. Kim, H.-M. Yang, I.-H. Yoon and M. Choi, Synergy between Zeolite Framework and Encapsulated Sulfur for Enhanced Ion-Exchange Selectivity to Radioactive Cesium, *Chem. Mater.*, 2018, **30**, 5777-5785.
